# Supplementary material for: Inverse-architecture perovskite solar cells with 5,6,11,12-tetraphenylnaphthacene as a hole conductor
Source: Royal Society of Chemistry journal article supplement (doi:10.1039/c7ra02496g), 2017-01-01
Supplement: c7ra02496g1.pdf [file c7ra02496g1.pdf]

# Supporting Information for

## Inverse-Architecture Perovskite Solar Cells with 5,6,11,12-tetraphenylnaphthacene as a Hole Conductor

Chengxin Wang,<sup>a</sup> Hao Hao,<sup>a</sup> Shufen Chen,<sup>\*a</sup> Kun Cao,<sup>a</sup> Hongtao Yu,<sup>a</sup>

Qin Zhang,<sup>a</sup> Guangjian Wan,<sup>b</sup> Wenjuan Shang,<sup>ac</sup> and Wei Huang<sup>\*ad</sup>

<sup>a</sup>Key Laboratory for Organic Electronics and Information Displays and Jiangsu National Synergetic Innovation Center for Advanced Materials, Nanjing University of Posts and Telecommunications, Nanjing 210023, China

<sup>b</sup>Nanjing Engineering Research Center for Preparation and Application of Advanced Fiber Materials, Nanjing University of Posts and Telecommunications, Nanjing 210023, China

<sup>c</sup>State Key Laboratory on Integrated Optoelectronics, College of Electronic Science and Engineering, Jilin University, Changchun 130012, China

<sup>d</sup>Key Laboratory of Flexible Electronics and National Synergistic Innovation Center for Advanced Materials, Nanjing Tech University, Nanjing 211816, China

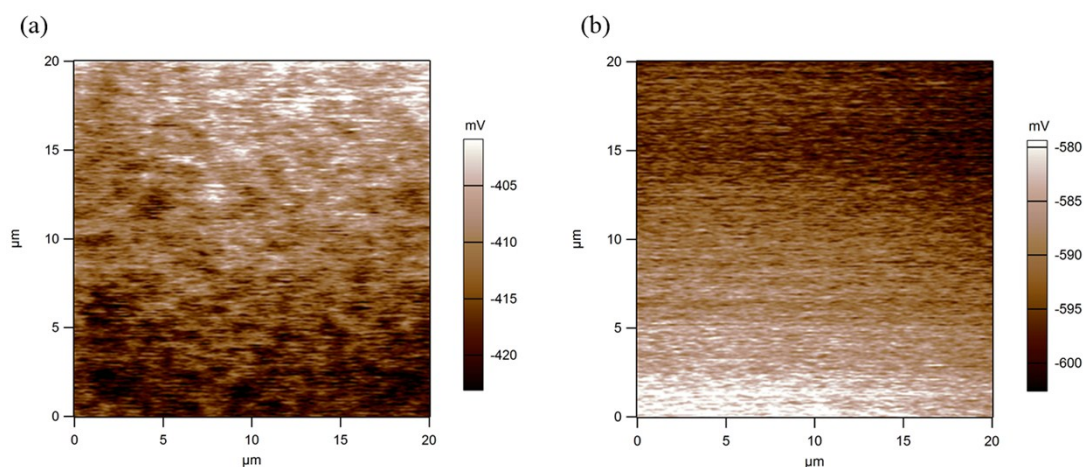

**Fig. S1** Two-dimensional surface potential distributions of (a) PEDOT:PSS and (b) rub films. The average values of the contact potential difference between sample and the probe are -412 and -594 mV for PEDOT:PSS and rub, respectively.

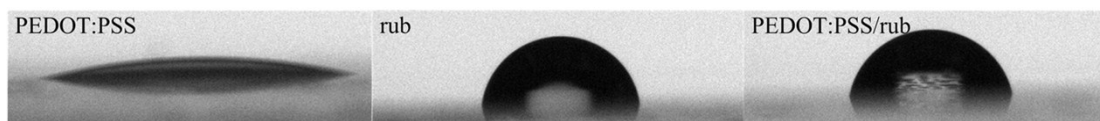

**Fig. S2** Photographs of the contact angle for the PEDOT:PSS, rub and PEDOT:PSS/rub substrate. The water contact angle for PEDOT:PSS, rub and PEDOT:PSS/rub are 9.5°, 80.3° and 77.2°, respectively.

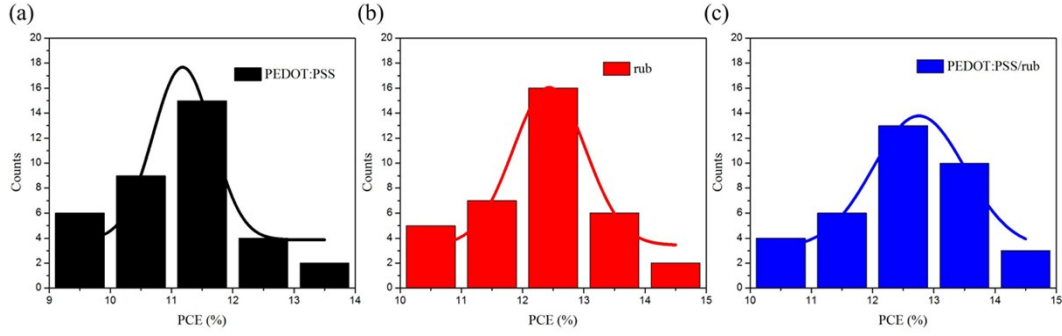

**Fig. S3** Histogram of solar cell efficiencies for 36 devices with (a) PEDOT:PSS, (b) rub, (c) PEDOT:PSS/rub as HTL, respectively. Black, red and blue solid lines represent the Gaussian distribution fitting for the statistics on efficiencies. The PCE mean values of Gauss distribution are 11.5%, 12.4%, 12.8% for PEDOT:PSS, rub and PEDOT:PSS/rub hole transport layer, respectively.

**Table S1** The calculated surface potential of PEDOT:PSS and rub with scanning Kelvin probe microscope. The formula is  $\varphi_s = \varphi_{\text{Tip}} + e \cdot V_{\text{CPD}}$ , of which  $\varphi_s$  is surface potential of sample,  $\varphi_{\text{Tip}}$  is the tip potential of yttrium probe, and  $V_{\text{CPD}}$  is the contact potential difference between sample and the probe.

| sample    | $\varphi_{\text{Tip}}$ (eV) | $V_{\text{CPD}}$ (V) | $\varphi_s$ (eV) |
|-----------|-----------------------------|----------------------|------------------|
| PEDOT:PSS | -4.47                       | -0.412               | -4.88            |
| rub       | -4.47                       | -0.594               | -5.06            |

**Table S2** Summarized PL lifetimes of perovskite layer on the hole transport layer of PEDOT:PSS, rub or PEDOT:PSS/rub. The PL lifetimes were fitted with a bi-exponential decay function including a fast decay ( $t_1$ ) and a slow decay ( $t_2$ ) process.

| HTL           | $A_1$                | $t_1$ (ns) | $A_2$             | $t_2$ (ns) |
|---------------|----------------------|------------|-------------------|------------|
| PEDOT:PSS     | $1.7 \times 10^{13}$ | 0.68       | $1.6 \times 10^4$ | 7.6        |
| rub           | $8.6 \times 10^{13}$ | 0.63       | $1.4 \times 10^4$ | 6.9        |
| PEDOT:PSS/rub | $1.7 \times 10^{13}$ | 0.68       | $1.7 \times 10^4$ | 7.2        |
